# Supplementary material
Source: PubMed Central journal article supplement (PMC7206856)
Supplement: supplementary_information_ddz250.pdf [file supplementary_information_ddz250.pdf]

# Supplementary Figure 1

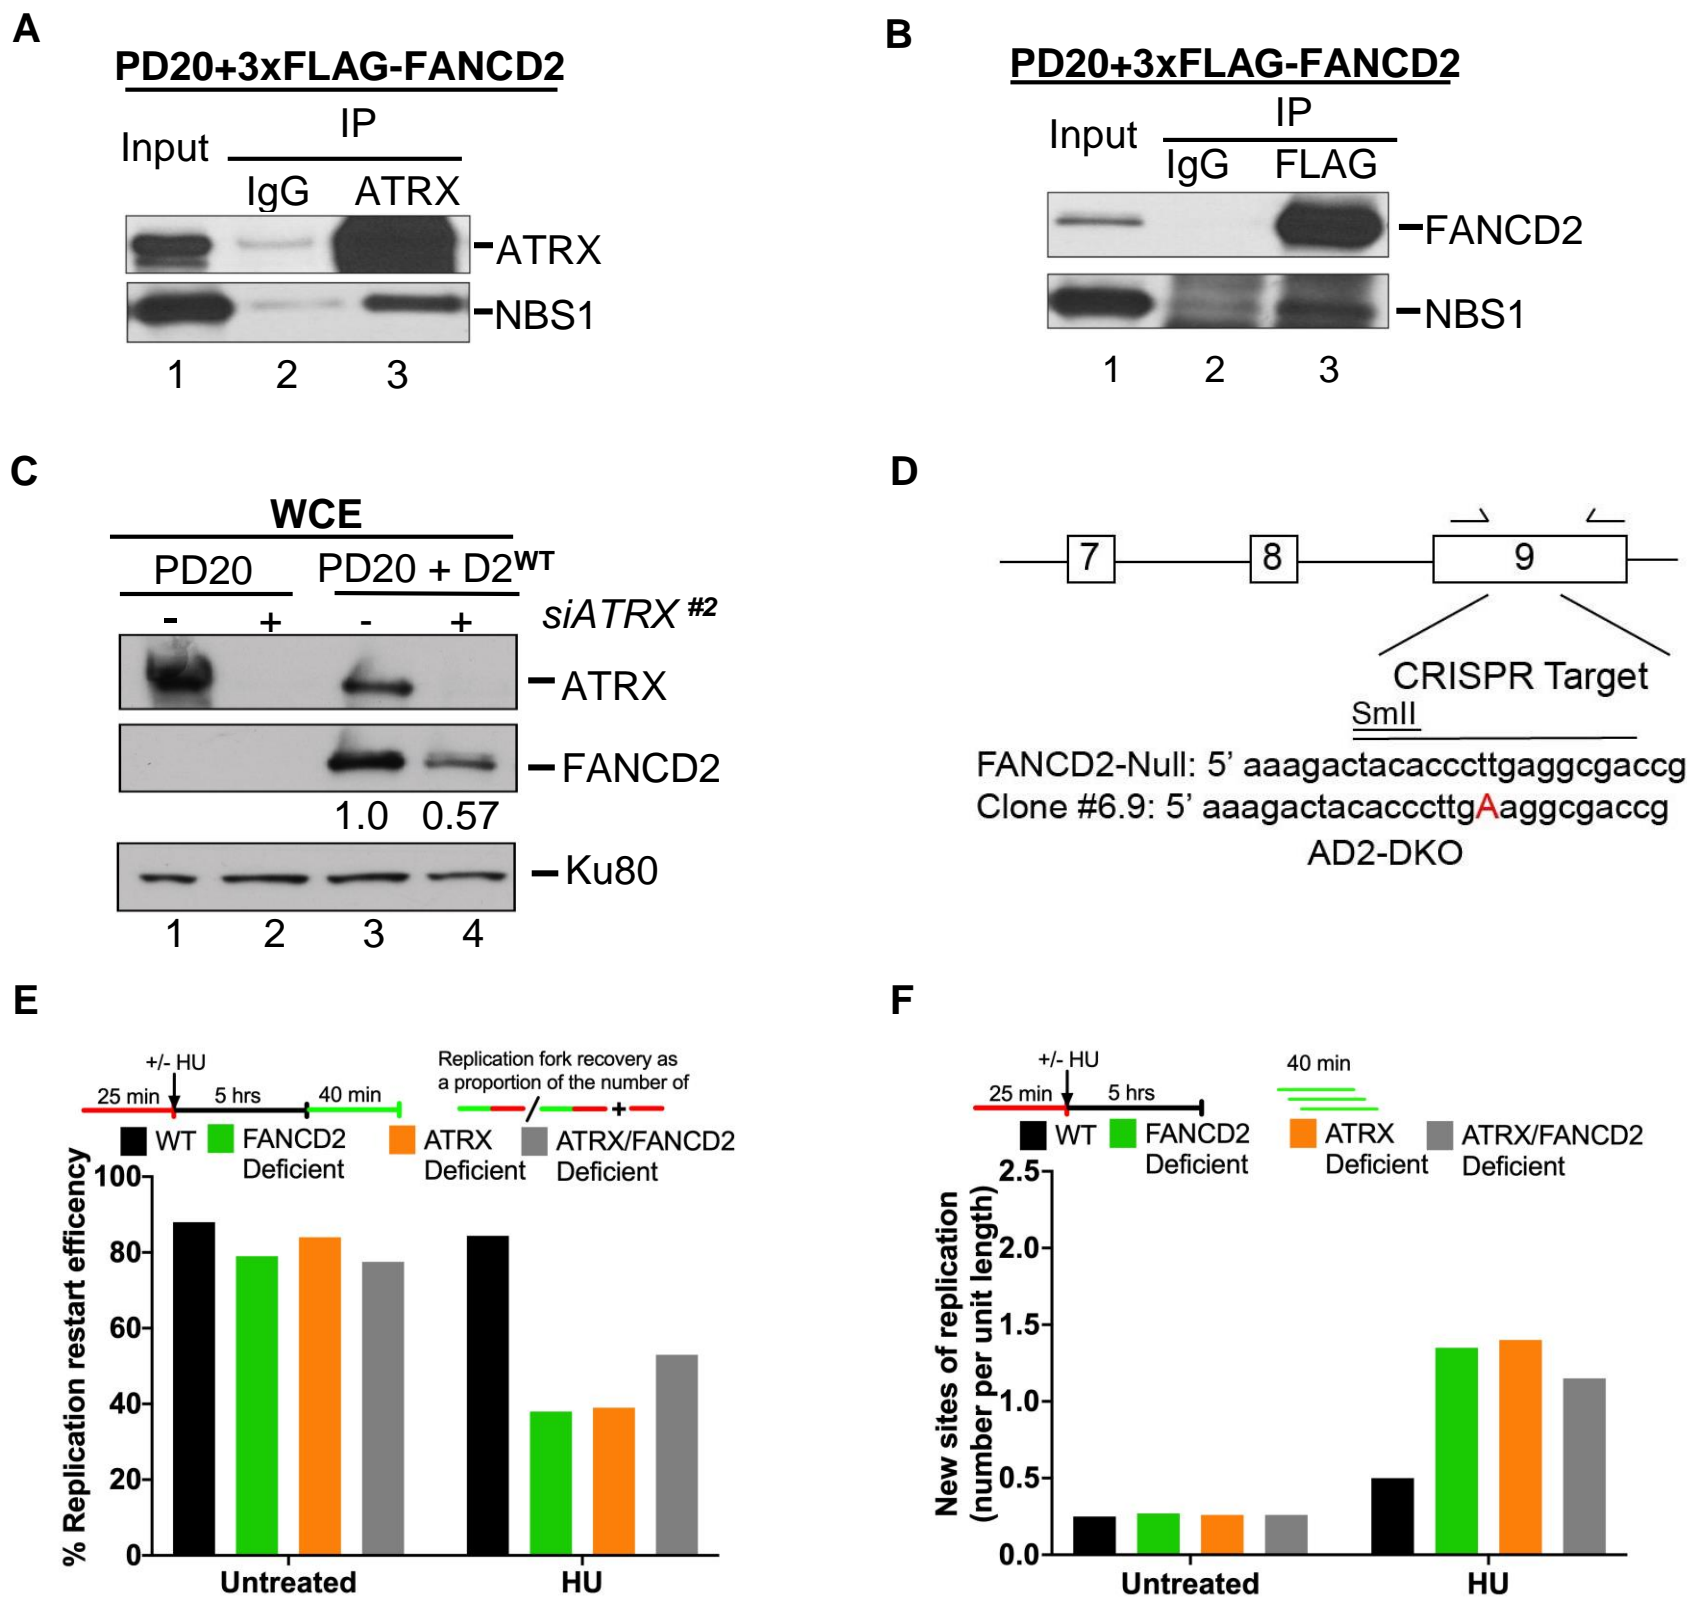

## Supplementary Figure 2

A

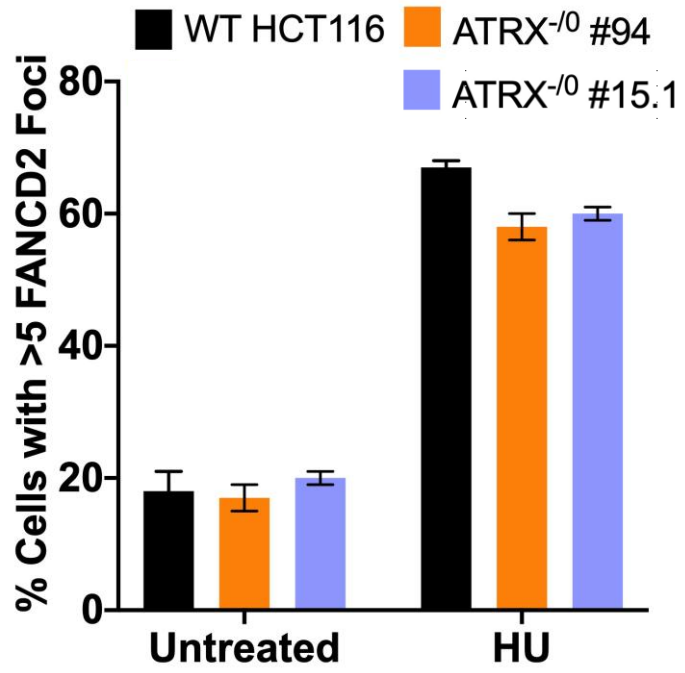

B

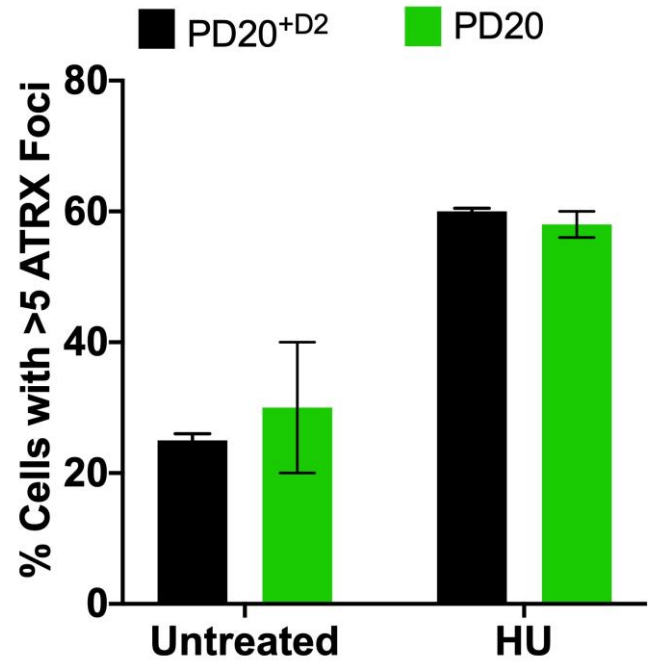

C

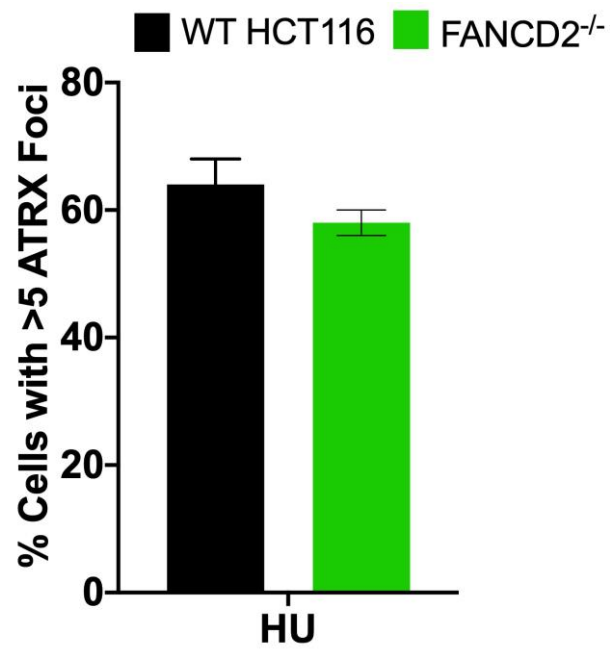

D

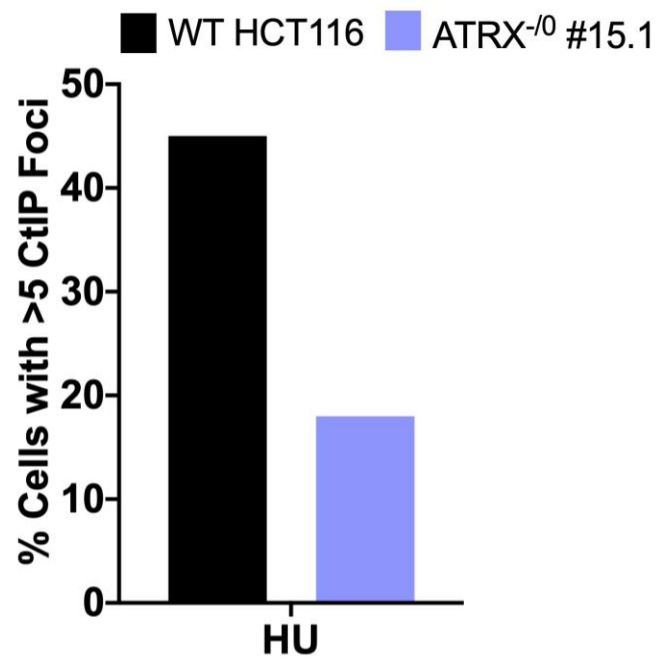

Supplementary Figure 3

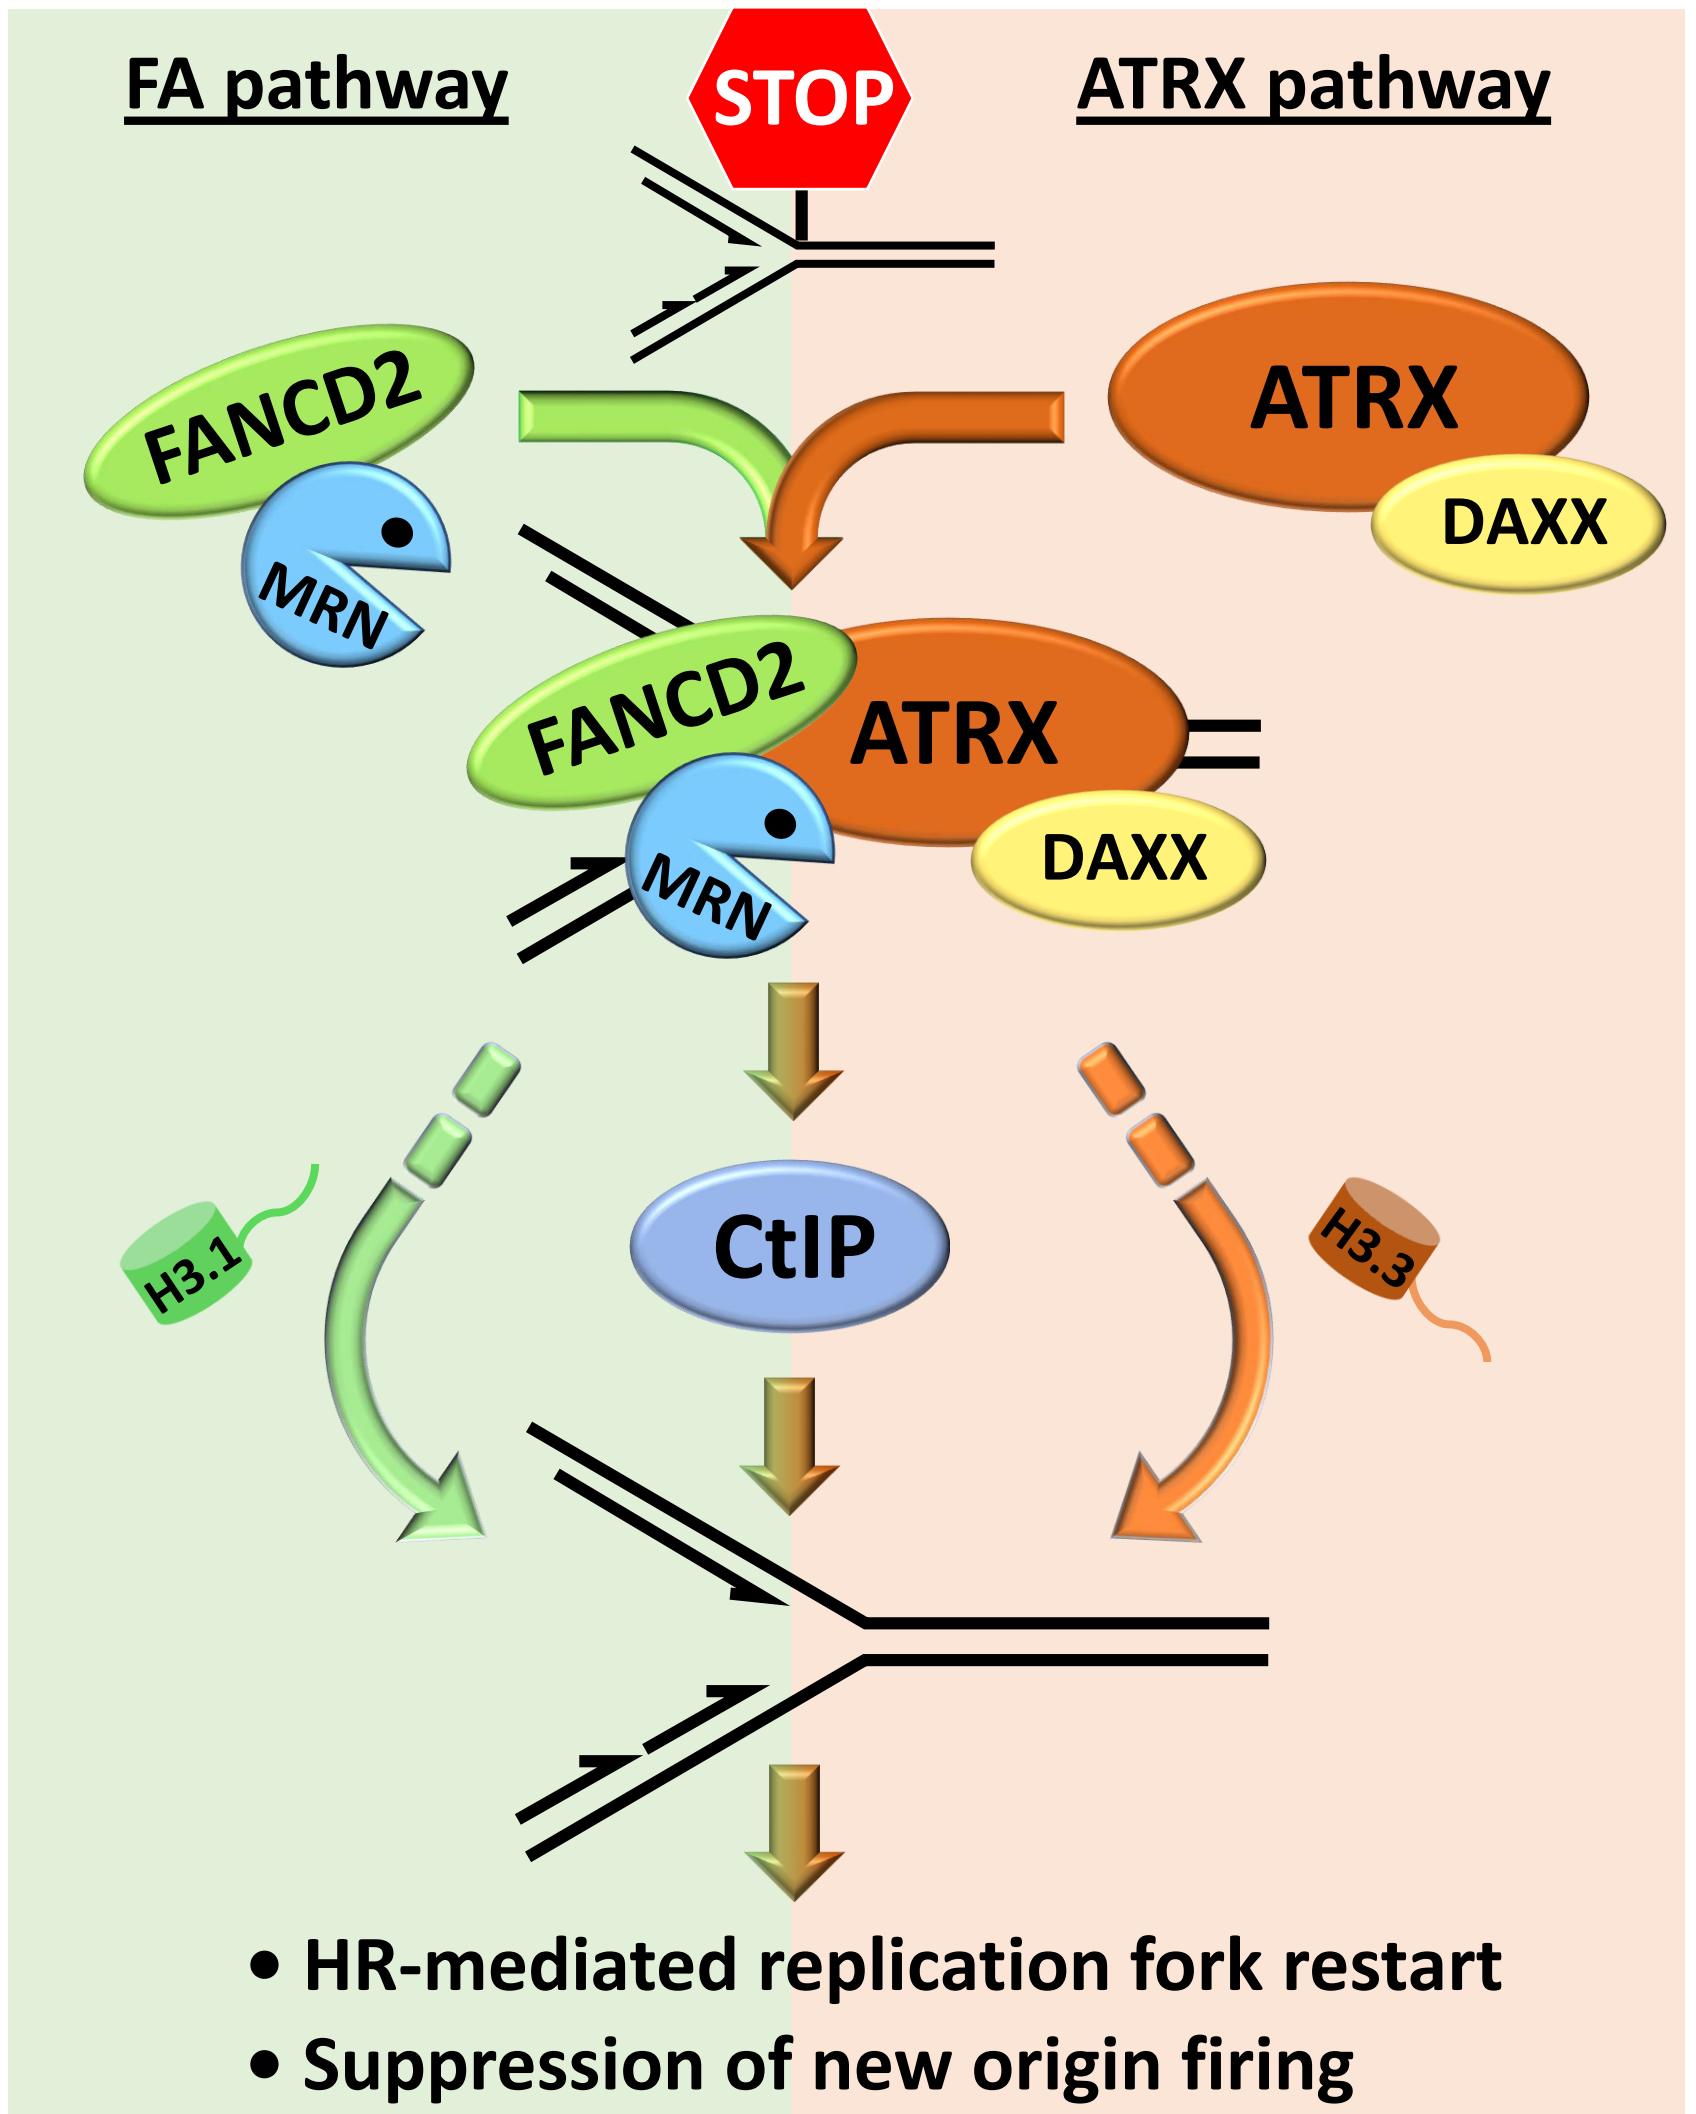

## SUPPLEMENTARY FIGURE LEGENDS

### Supplementary Figure 1

IP experiments were performed from nuclear extracts (NE) of PD20+3xFLAG-FANCD2 (wild type) cells. **(A)** *NBS1 co-IPs with ATRX*. NEs (lane 1) were subjected to IP with mouse IgG (lane 2) or an anti-ATR<sub>X</sub> antibody (lane 3). NE and IP samples were analyzed for the presence of ATR<sub>X</sub> and NBS1 by western blot. **(B)** *NBS1 co-IPs with FANCD2*. NEs (lane 1) were subjected to IP with mouse IgG (lane 2) or an anti-FLAG antibody (lane 3). NE and IP samples were analyzed for the presence of FANCD2 and NBS1 by western blot. **(C)** Whole cell extracts (WCE) were prepared from PD20+D2 or PD20 cells that had been treated with control siRNA (lanes 1 and 3) or ATR<sub>X</sub>-#2 siRNA (lanes 2 and 4) and analyzed for the presence of ATR<sub>X</sub> and FANCD2. Ku-80, loading control. Immunoblot signals for FANCD2 in lanes 3 and 4 were analyzed by densitometry and normalized against Ku80 signals using ImageJ. The relative FANCD2 protein level values are provided underneath each corresponding lane. **(D)** *Schematic of the CRISPR/Cas9 targeting of FANCD2 exon 9 in HCT116 cells*. Sequencing data show a single base pair insertion (in red) in AD2-DKO clone #6.9. **(E-F)** FANCD2 and ATR<sub>X</sub> cooperate to promote replication fork restart and suppress new origin firing in a human fibroblast cell line after HU treatment. **(E)** *ATR<sub>X</sub> and FANCD2 cooperate to mediate replication fork restart*. Replication fork restart efficiencies were compared between WT (PD20+D2), FANCD2-deficient (PD20), ATR<sub>X</sub>-deficient (PD20+D2, siATR<sub>X</sub>) and FANCD2/ATR<sub>X</sub> double-deficient (PD20, siATR<sub>X</sub>) cells. **(F)** *ATR<sub>X</sub> and FANCD2 act in concert to suppress new origin firing during replication blockade*. The number of new replication sites originating during BioU labeling after HU treatment was compared between WT (PD20+D2), FANCD2-deficient (PD20), ATR<sub>X</sub>-deficient (PD20+D2, siATR<sub>X</sub>) and FANCD2/ATR<sub>X</sub> double-deficient (PD20, siATR<sub>X</sub>) cells.

### Supplementary Figure 2

(A) *FANCD2* foci formation occurs independently of *ATR*X during normal DNA replication and following replication stress. HCT116 WT cells and two different *ATR*X<sup>-0</sup> clones (#94 and #15.1) were untreated or treated with 2 mM HU for 20 hr and analyzed for the presence of *FANCD2* foci. Nuclei with > 5 foci were considered positive for *FANCD2* foci formation. (B and C) *ATR*X foci formation occurs independently of *FANCD2* during normal DNA replication and following replication stress. (B) PD20+D2 (*FANCD2*-proficient) and PD20 (*FANCD2*-deficient) fibroblast cells were untreated or treated with 2mM HU for 20 hr and analyzed for the presence of *ATR*X foci. Nuclei with > 5 foci were considered positive for *ATR*X foci formation. (C) Same experiment as in B, but performed in HCT116 WT and *FANCD2*<sup>-/-</sup> cells. (D, accompanies Main Fig 4B) *ATR*X is required for the HU-inducible *CtIP* foci formation. HCT116 WT cells and a second *ATR*X<sup>-0</sup> clone (#15.1) were treated with 2 mM HU for 20 hours and analyzed for the presence of *CtIP* foci. Nuclei with > 5 foci were considered positive for *CtIP* foci formation.

### Supplementary Figure 3

Model of the physical and functional FA-*ATR*X pathway interactions during the restart of HU-stalled replication forks.

### Supplementary Table 1

Summary of all P-values for results shown in Main Figures 2 to 6.

## Supplementary Table 1

| Figure                                      | Samples                                            | p-value (two tales) |
|---------------------------------------------|----------------------------------------------------|---------------------|
| 2B                                          | WT vs D2 <sup>-/-</sup> Day 5                      | 0.001               |
|                                             | WT vs ATRX <sup>-/0</sup> Day 5                    | 0.011               |
|                                             | WT vs AD2 <sup>DKO</sup> Day 5                     | 0.0001              |
|                                             | ATRX <sup>-/0</sup> vs AD2 <sup>DKO</sup> Day 5    | 0.001               |
|                                             | D2 <sup>-/-</sup> vs AD2 <sup>DKO</sup> Day 5      | 0.016               |
|                                             |                                                    |                     |
| 2C                                          | WT vs D2 <sup>-/-</sup> 150uM HU                   | 0.000149            |
|                                             | WT vs ATRX <sup>-/0</sup> 150uM HU                 | 0.022412            |
|                                             | WT vs AD2 <sup>DKO</sup> 150uM HU                  | 0.010017            |
|                                             | ATRX <sup>-/0</sup> vs D2 <sup>-/-</sup> 150uM HU  | ns                  |
|                                             | ATRX <sup>-/0</sup> vs AD2 <sup>DKO</sup> 150uM HU | ns                  |
|                                             | D2 <sup>-/-</sup> vs AD2 <sup>DKO</sup> 150uM HU   | ns                  |
|                                             | D2 <sup>-/-</sup> vs AD2 <sup>DKO</sup>            | ns                  |
|                                             |                                                    |                     |
| 3B                                          | WT vs D2 <sup>-/-</sup>                            | ns                  |
|                                             | WT vs ATRX <sup>-/0</sup>                          | ns                  |
|                                             | WT vs AD2 <sup>DKO</sup>                           | ns                  |
|                                             | ATRX <sup>-/0</sup> vs D2 <sup>-/-</sup>           | ns                  |
|                                             | ATRX <sup>-/0</sup> vs AD2 <sup>DKO</sup>          | ns                  |
|                                             | D2 <sup>-/-</sup> vs AD2 <sup>DKO</sup>            | ns                  |
|                                             | WT vs D2 <sup>-/-</sup> +HU                        | 0.00063             |
|                                             | WT vs ATRX <sup>-/0</sup> +HU                      | 0.00029             |
|                                             | WT vs AD2 <sup>DKO</sup> +HU                       | 0.00227             |
|                                             | ATRX <sup>-/0</sup> vs D2 <sup>-/-</sup> +HU       | ns                  |
|                                             | ATRX <sup>-/0</sup> vs AD2 <sup>DKO</sup> +HU      | ns                  |
| D2 <sup>-/-</sup> vs AD2 <sup>DKO</sup> +HU | 0.01368                                            |                     |

|    |                                                      |         |
|----|------------------------------------------------------|---------|
|    |                                                      |         |
| 3C | WT vs D2 <sup>-/-</sup>                              | ns      |
|    | WT vs ATRX <sup>-/0</sup>                            | ns      |
|    | WT vs AD2 <sup>DKO</sup>                             | ns      |
|    | ATRX <sup>-/0</sup> vs D2 <sup>-/-</sup>             | ns      |
|    | ATRX <sup>-/0</sup> vs AD2 <sup>DKO</sup>            | ns      |
|    | D2 <sup>-/-</sup> vs AD2 <sup>DKO</sup>              | ns      |
|    | WT vs D2 <sup>-/-</sup> +HU                          | 0.00227 |
|    | WT vs ATRX <sup>-/0</sup> +HU                        | 0.00288 |
|    | WT vs AD2 <sup>DKO</sup> +HU                         | 0.02518 |
|    | ATRX <sup>-/0</sup> vs D2 <sup>-/-</sup> +HU         | ns      |
|    | ATRX <sup>-/0</sup> vs AD2 <sup>DKO</sup> +HU        | ns      |
|    | D2 <sup>-/-</sup> vs AD2 <sup>DKO</sup> +HU          | 0.00728 |
|    |                                                      |         |
| 3D | WT vs D2 <sup>-/-</sup> +HU                          | 0.00205 |
|    | WT vs ATRX <sup>-/0</sup> +HU                        | 0.00224 |
|    | WT vs AD2 <sup>DKO</sup> +HU                         | 0.00681 |
|    | ATRX <sup>-/0</sup> vs D2 <sup>-/-</sup> +HU         | ns      |
|    | ATRX <sup>-/0</sup> vs AD2 <sup>DKO</sup> +HU        | ns      |
|    | D2 <sup>-/-</sup> vs AD2 <sup>DKO</sup> +HU          | 0.00589 |
|    | WT vs D2 <sup>-/-</sup> +HU +Mirin                   | ns      |
|    | WT vs ATRX <sup>-/0</sup> +HU +Mirin                 | ns      |
|    | WT vs AD2 <sup>DKO</sup> +HU +Mirin                  | 0.03137 |
|    | ATRX <sup>-/0</sup> vs D2 <sup>-/-</sup> +HU +Mirin  | ns      |
|    | ATRX <sup>-/0</sup> vs AD2 <sup>DKO</sup> +HU +Mirin | ns      |
|    | D2 <sup>-/-</sup> vs AD2 <sup>DKO</sup> +HU +Mirin   | 0.00303 |
|    |                                                      |         |
| 3E | WT vs D2 <sup>-/-</sup> +HU                          | 0.00108 |
|    | WT vs ATRX <sup>-/0</sup> +HU                        | 0.00204 |

|    |                                                                  |         |
|----|------------------------------------------------------------------|---------|
|    | WT vs AD2-DKO +HU                                                | 0.00049 |
|    | ATR <sup>X</sup> <sup>-/0</sup> vs D2 <sup>-/-</sup> +HU         | ns      |
|    | ATR <sup>X</sup> <sup>-/0</sup> vs AD2 <sup>DKO</sup> +HU        | ns      |
|    | D2 <sup>-/-</sup> vs AD2 <sup>DKO</sup> +HU                      | 0.00165 |
|    | WT vs D2 <sup>-/-</sup> +HU +Mirin                               | ns      |
|    | WT vs ATR <sup>X</sup> <sup>-/0</sup> +HU +Mirin                 | ns      |
|    | WT vs AD2 <sup>DKO</sup> +HU +Mirin                              | 0.0333  |
|    | ATR <sup>X</sup> <sup>-/0</sup> vs D2 <sup>-/-</sup> +HU +Mirin  | ns      |
|    | ATR <sup>X</sup> <sup>-/0</sup> vs AD2 <sup>DKO</sup> +HU +Mirin | ns      |
|    | D2 <sup>-/-</sup> vs AD2 <sup>DKO</sup> +HU +Mirin               | 0.00150 |
|    |                                                                  |         |
| 4B | WT vs D2 <sup>-/-</sup> +HU                                      | 0.00119 |
|    | WT vs ATR <sup>X</sup> <sup>-/0</sup> +HU                        | 0.00031 |
|    | WT vs AD2-DKO +HU                                                | 0.00122 |
|    | ATR <sup>X</sup> <sup>-/0</sup> vs D2 <sup>-/-</sup> +HU         | ns      |
|    | ATR <sup>X</sup> <sup>-/0</sup> vs AD2-DKO +HU                   | ns      |
|    | D2 <sup>-/-</sup> vs AD2-DKO +HU                                 | ns      |
|    |                                                                  |         |
| 4C | WT vs D2 <sup>-/-</sup>                                          | 0.0053  |
|    | WT vs ATR <sup>X</sup> <sup>-/0</sup>                            | 0.02528 |
|    | WT vs AD2 <sup>DKO</sup>                                         | 0.01945 |
|    | ATR <sup>X</sup> <sup>-/0</sup> vs D2 <sup>-/-</sup>             | ns      |
|    | ATR <sup>X</sup> <sup>-/0</sup> vs AD2 <sup>DKO</sup>            | ns      |
|    | D2 <sup>-/-</sup> vs AD2 <sup>DKO</sup>                          | ns      |
|    |                                                                  |         |
| 4E | siControl vs siFANCD2                                            | 0.00414 |
|    | siControl vs siATR <sup>X</sup>                                  | 0.00233 |
|    | siControl vs siFANCD2+siATR <sup>X</sup>                         | 0.00427 |



|    |                                              |         |
|----|----------------------------------------------|---------|
|    | siControl vs siRAD51                         | 0.00920 |
|    | siATRX vs siFANCD2                           | ns      |
|    | siATRX vs<br>siFANCD2+siATRX                 | ns      |
|    | siATRX vs siRAD51                            | 0.00016 |
|    | siFANCD2 vs<br>siFANCD2+siATRX               | ns      |
|    | siFANCD2 vs siRAD51                          | 0.00065 |
|    | siFANCD2+siATRX vs<br>siRAD51                | 0.00173 |
|    |                                              |         |
| 5B | WT vs D2 Deficient                           | ns      |
|    | WT vs siDAXX                                 | ns      |
|    | WT vs D2 Deficient +<br>siDAXX               | ns      |
|    | D2 Deficient vs siDAXX                       | ns      |
|    | D2 Deficient vs D2 Deficient<br>+ siDAXX     | ns      |
|    | siDAXX vs D2 Deficient +<br>siDAXX           | ns      |
|    | WT vs D2 Deficient +HU                       | 0.00002 |
|    | WT vs siDAXX +HU                             | 0.00157 |
|    | WT vs D2 Deficient +<br>siDAXX +HU           | 0.00002 |
|    | D2 Deficient vs siDAXX +HU                   | ns      |
|    | D2 Deficient vs D2 Deficient<br>+ siDAXX +HU | 0.00326 |
|    | siDAXX vs D2 Deficient +<br>siDAXX +HU       | ns      |
|    |                                              |         |
| 5C | WT vs D2 Deficient                           | ns      |
|    | WT vs siDAXX                                 | ns      |
|    | WT vs D2 Deficient +<br>siDAXX               | ns      |
|    | D2 Deficient vs siDAXX                       | ns      |
|    | D2 Deficient vs D2 Deficient<br>+ siDAXX     | ns      |

|    |                                                      |          |
|----|------------------------------------------------------|----------|
|    | siDAXX vs D2 Deficient + siDAXX                      | ns       |
|    | WT vs D2 Deficient +HU                               | 0.002269 |
|    | WT vs siDAXX +HU                                     | 0.002882 |
|    | WT vs D2 Deficient + siDAXX +HU                      | 0.007286 |
|    | D2 Deficient vs siDAXX +HU                           | ns       |
|    | D2 Deficient vs D2 Deficient + siDAXX +HU            | 0.025182 |
|    | siDAXX vs D2 Deficient + siDAXX +HU                  | ns       |
|    |                                                      |          |
| 6C | WT vs D2 <sup>-/-</sup>                              | ns       |
|    | WT vs +FANCD2 <sup>WT</sup>                          | ns       |
|    | WT vs +FANCD2 <sup>231R</sup>                        | ns       |
|    | WT vs FANCL <sup>-/-</sup>                           | ns       |
|    | D2 <sup>-/-</sup> vs +FANCD2 <sup>WT</sup>           | ns       |
|    | D2 <sup>-/-</sup> vs +FANCD2 <sup>231R</sup>         | ns       |
|    | D2 <sup>-/-</sup> vs FANCL <sup>-/-</sup>            | ns       |
|    | +FANCD2 <sup>WT</sup> vs +FANCD2 <sup>231R</sup>     | ns       |
|    | +FANCD2 <sup>WT</sup> vs FANCL <sup>-/-</sup>        | ns       |
|    | +FANCD2 <sup>231R</sup> vs FANCL <sup>-/-</sup>      | ns       |
|    | WT vs D2 <sup>-/-</sup> +HU                          | 0.00273  |
|    | WT vs +FANCD2 <sup>WT</sup> +HU                      | ns       |
|    | WT vs +FANCD2 <sup>231R</sup> +HU                    | 0.00373  |
|    | WT vs FANCL <sup>-/-</sup> +HU                       | ns       |
|    | D2 <sup>-/-</sup> vs +FANCD2 <sup>WT</sup> +HU       | 0.00837  |
|    | D2 <sup>-/-</sup> vs +FANCD2 <sup>231R</sup> +HU     | ns       |
|    | D2 <sup>-/-</sup> vs FANCL <sup>-/-</sup> +HU        | 0.00288  |
|    | +FANCD2 <sup>WT</sup> vs +FANCD2 <sup>231R</sup> +HU | 0.00373  |
|    | +FANCD2 <sup>WT</sup> vs FANCL <sup>-/-</sup> +HU    | ns       |

|    |                                                         |         |
|----|---------------------------------------------------------|---------|
|    | +FANCD2 <sup>231R</sup> vs FANCL <sup>-/-</sup><br>+HU  | 0.002   |
|    |                                                         |         |
| 6D | WT vs D2 <sup>-/-</sup>                                 | ns      |
|    | WT vs +FANCD2 <sup>WT</sup>                             | ns      |
|    | WT vs +FANCD2 <sup>231R</sup>                           | ns      |
|    | WT vs FANCL <sup>-/-</sup>                              | ns      |
|    | D2 <sup>-/-</sup> vs +FANCD2 <sup>WT</sup>              | ns      |
|    | D2 <sup>-/-</sup> vs +FANCD2 <sup>231R</sup>            | ns      |
|    | D2 <sup>-/-</sup> vs FANCL <sup>-/-</sup>               | ns      |
|    | +FANCD2 <sup>WT</sup> vs +FANCD2 <sup>231R</sup>        | ns      |
|    | +FANCD2 <sup>WT</sup> vs FANCL <sup>-/-</sup>           | ns      |
|    | +FANCD2 <sup>231R</sup> vs FANCL <sup>-/-</sup>         | ns      |
|    | WT vs D2 <sup>-/-</sup> +HU                             | 0.01613 |
|    | WT vs +FANCD2 <sup>WT</sup> +HU                         | ns      |
|    | WT vs +FANCD2 <sup>231R</sup> +HU                       | 0.02381 |
|    | WT vs FANCL <sup>-/-</sup> +HU                          | ns      |
|    | D2 <sup>-/-</sup> vs +FANCD2 <sup>WT</sup> +HU          | 0.01507 |
|    | D2 <sup>-/-</sup> vs +FANCD2 <sup>231R</sup> +HU        | ns      |
|    | D2 <sup>-/-</sup> vs FANCL <sup>-/-</sup> +HU           | ns      |
|    | +FANCD2 <sup>WT</sup> vs +FANCD2 <sup>231R</sup><br>+HU | 0.002   |
